# Supplementary material
Source: PubMed Central journal article supplement (PMC9900348)
Supplement: EMBR-24-e55472-s003.pdf [file EMBR-24-e55472-s003.pdf]

## Expanded View Figures

### Figure EV1. Phosphorylation of TFEB S401 induced by oxidative stress. Related to Fig 1.

- A Table showing mass spectrometry analysis of the abundance ratios of TFEB phosphorylated peptides in S401 from NaAsO<sub>2</sub>-treated cells versus control cells.
- B Immunoblot analysis of protein lysates from U2OS cells expressing TFEB-WT-FLAG treated with 150 μM NaAsO<sub>2</sub> or 250 nM Torin-1 for 1 h. Two different rabbit polyclonal antibodies raised against a TFEB-S401 phospho-specific peptide were tested.
- C Quantification of the nuclear localization of recombinant TFEB in ARPE-19 cells expressing TFEB-WT-FLAG or TFEB-S401A-FLAG and treated with 250 nM Torin-1 or 250 μM NaAsO<sub>2</sub> for 1 h or EBSS for 4 h. Data are presented as mean ± SD using one-way ANOVA (unpaired) followed by Tukey's multiple comparisons test, (ns) not significant as compared to the same treatment in TFEB-WT-FLAG overexpressing cells, with > 300 cells counted per trial from three independent experiments.
- D Immunoblot analysis of protein lysates from ARPE-19 cells treated with 250 μM NaAsO<sub>2</sub> for 1 h were subjected to subcellular fractionation. Immunoblots are representative of at least three independent experiments.
- E Relative quantitative RT-PCR analysis of the mRNA expression of lysosome- (MCOLN1 and ATP6V1C1), autophagy- (UVRAG), mitochondria- (PGC-1α), cell cycle- (CDKN1a), and heme catabolism-related (HMOX1) genes in ARPE-19 cells overexpressing either TFEB-WT-FLAG, TFEB-S401A-FLAG, or TFEB-S401D-FLAG. Data are presented as mean ± SD using one-way ANOVA (unpaired) followed by Tukey's multiple comparisons test, (ns) not significant and \**P* < 0.01 from three independent experiments.

Data information: *n* = 3 biological replicates (each dot represents a biological replicate).

Source data are available online for this figure.

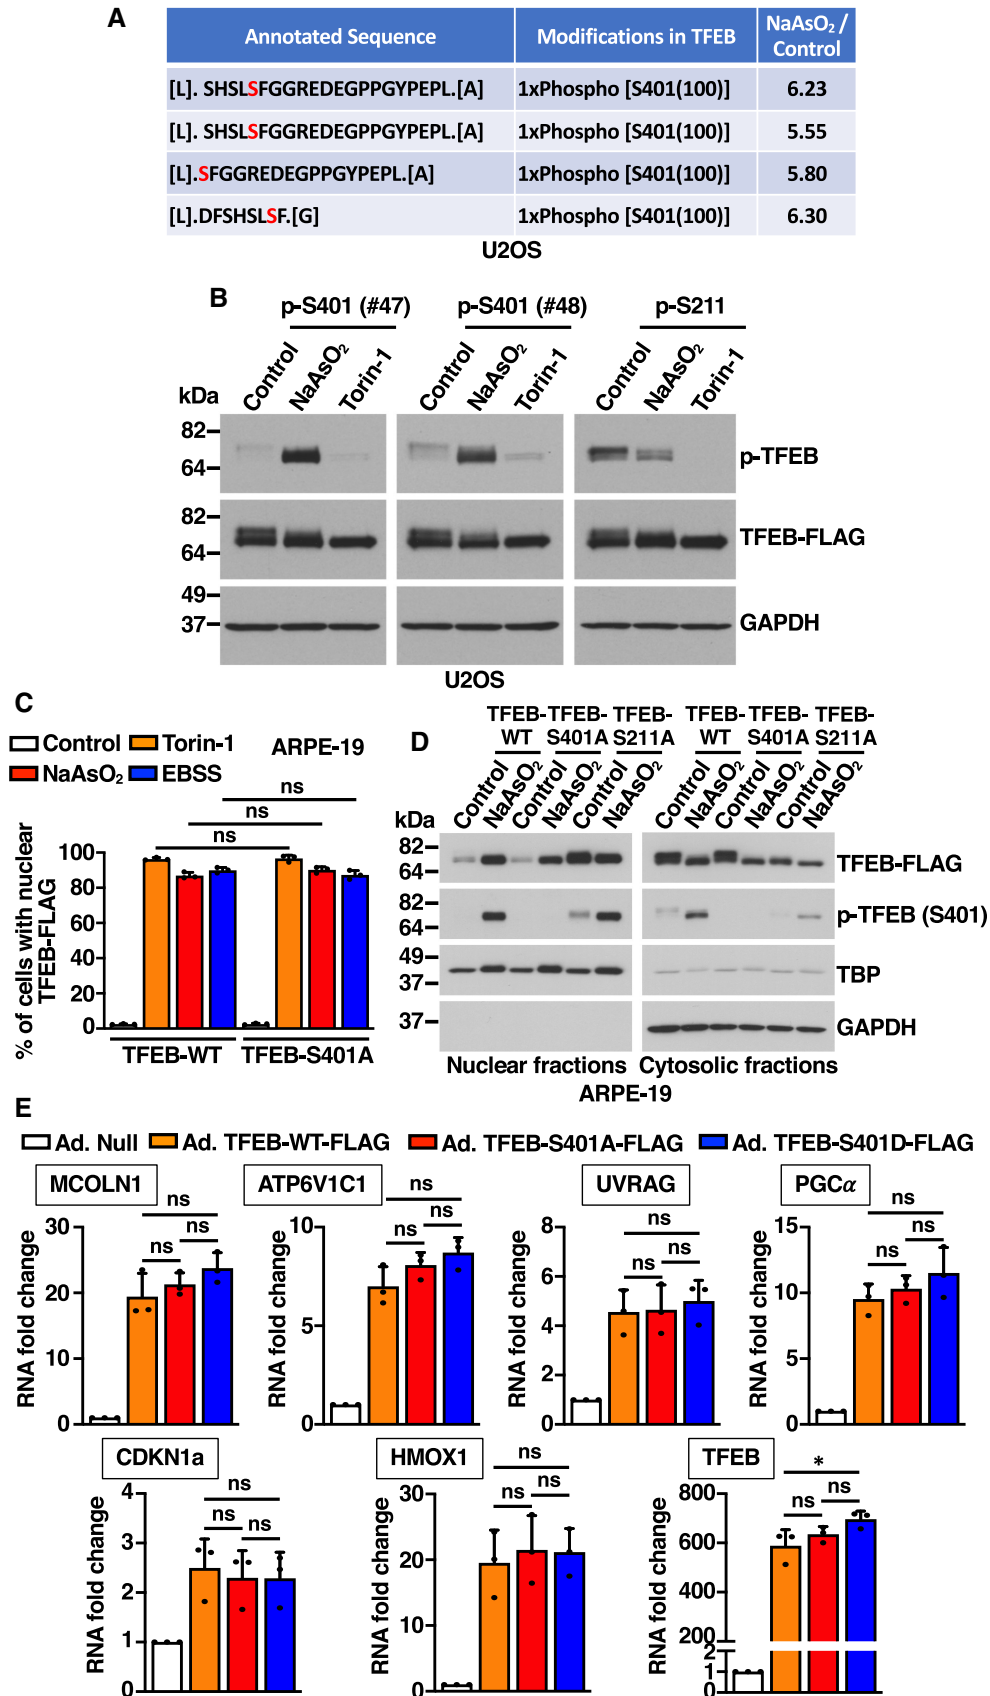

Figure EV1.

**Figure EV2. Phosphorylation of TFEB S401 by p38 MAPK. Related to Fig 2.**

- A Immunoblot analysis of protein lysates from ARPE-19 cells expressing TFEB-WT-FLAG incubated with 15 mM NAC, 20  $\mu$ M SB203580, 250 nM Torin-1 for 1 h or EBSS for 4 h prior to the addition of 250  $\mu$ M NaAsO<sub>2</sub> for 1 h.
- B Immunoblot analysis of protein lysates from ARPE-19 cells expressing TFEB-WT-FLAG incubated with 250  $\mu$ M NaAsO<sub>2</sub> for 1 h. Then, cells were washed with HBSS and incubated in fresh medium without NaAsO<sub>2</sub> for the indicated times.
- C Immunoblot analysis of protein lysates from HeLa and ARPE-19 cells.
- D Immunoblot analysis of protein lysates from HeLa cells stably expressing TFEB-WT-FLAG depleted of p38 MAPK ( $\alpha$ ), p38 MAPK ( $\beta$ ), or p38 MAPK ( $\alpha + \beta$ ) and incubated with 200  $\mu$ M NaAsO<sub>2</sub> for 1 h or irradiated with UV-C light and recovered for 30 min. Immunoblots are representative of at least three independent experiments.
- E Immunoblot analysis of protein lysates from HeLa cells stably expressing TFEB-WT-FLAG depleted of MAPKAPK2, MAPKAPK3, MSK1, and MSK2 and incubated with 200  $\mu$ M NaAsO<sub>2</sub> for 1 h. Immunoblots are representative of at least three independent experiments.
- F Immunoblot analysis of protein lysates from HeLa cells stably expressing TFEB-WT-FLAG incubated with the indicated kinase inhibitors for 1 h prior to the addition of 200  $\mu$ M NaAsO<sub>2</sub> for 1 h.

Source data are available online for this figure.

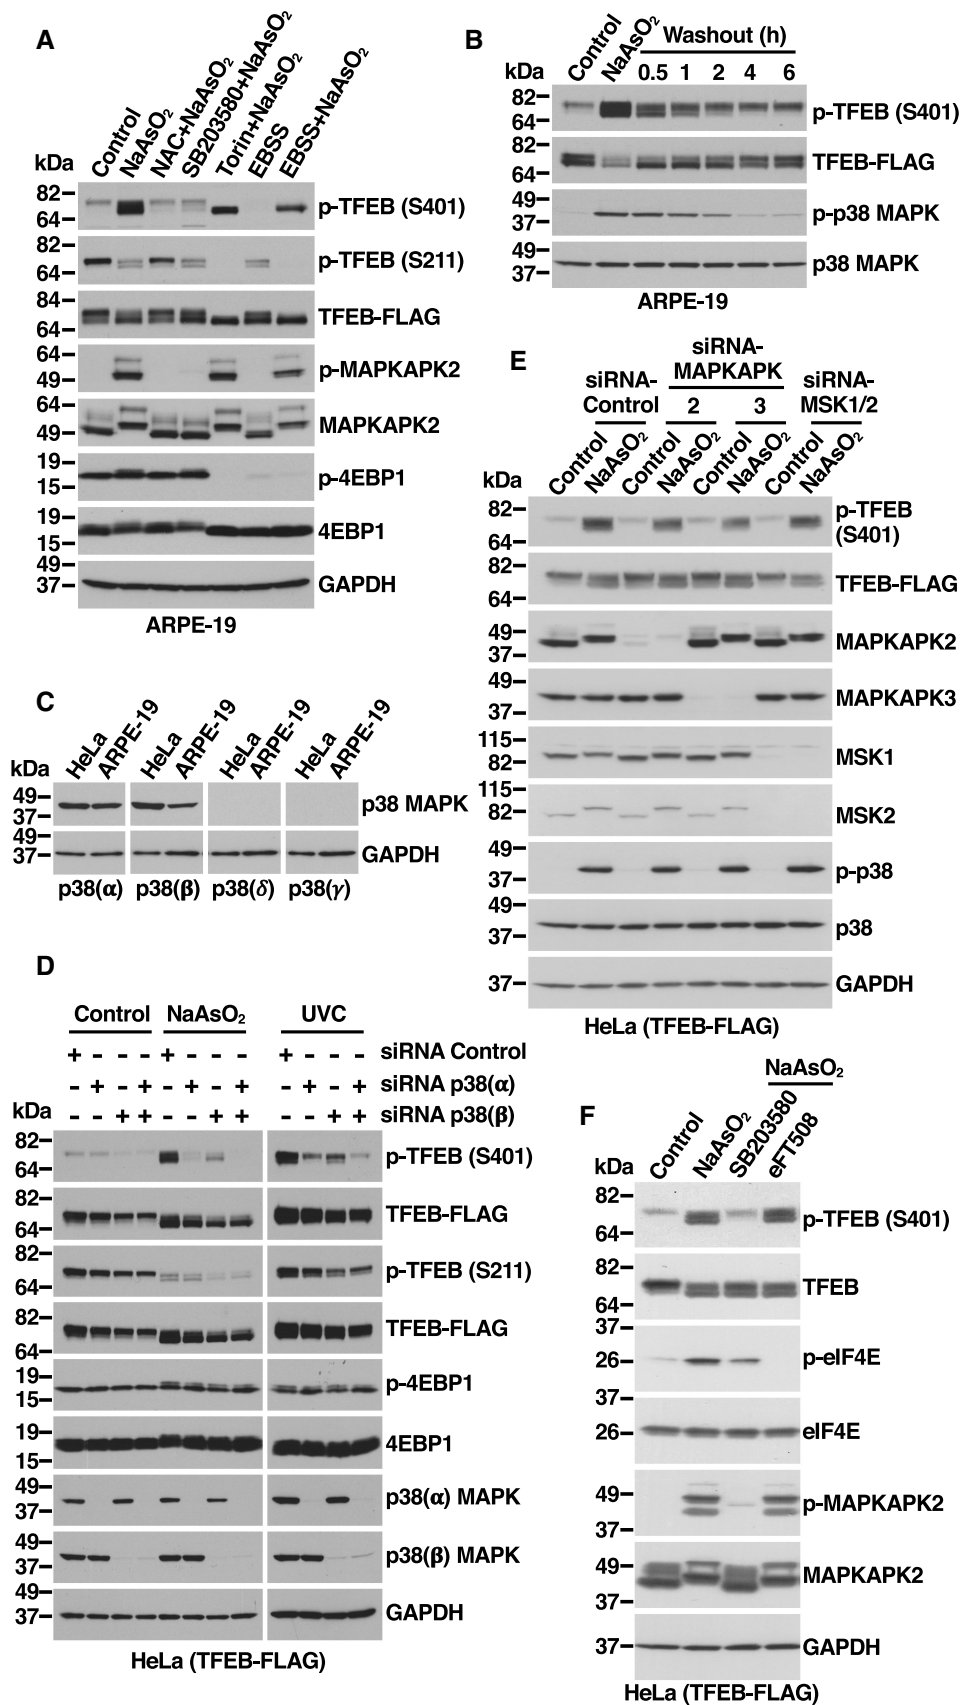

Figure EV2.

**Figure EV3. TFEB-S401 phosphorylation induced by NaAsO<sub>2</sub> and LPS treatments is absent in S401A knock-in THP1 cells. Related to Fig 3.**

- A Flowchart indicating the different steps followed to differentiate primary human monocytes into macrophage cells.
- B Immunoblot analysis of protein lysates from primary human monocytes undifferentiated (Naïve) or GM-CSF-differentiated primary macrophages. Samples are from three independent experiments.
- C Immunoblot analysis of protein lysates from primary human macrophages incubated with 1 µg/ml LPS for the indicated times. Immunoblots are representative of at least four independent experiments.
- D Quantification of immunoblot data shown in (C). Data are presented as mean ± SD using one-way ANOVA (unpaired) followed by Dunnett's multiple comparisons test, \*\**P* < 0.01, \*\*\**P* < 0.001 and \*\*\*\**P* < 0.0001 as compared to untreated cells from at least four independent experiments.
- E Immunoblot analysis of protein lysates from THP1 cells WT or TFEB-S401A knock-ins (clones I11 and M17) incubated with 100 µM NaAsO<sub>2</sub> for 1 h.
- F Immunoblot analysis of protein lysates from PMA-differentiated THP1 cells WT or TFEB-S401A knock-ins (clones I11 and M17) incubated with 1 µg/ml LPS for the indicated times. Immunoblots are representative of at least three independent experiments.

Data information: *n* ≥ 3 biological replicates (each dot represents a biological replicate).

Source data are available online for this figure.

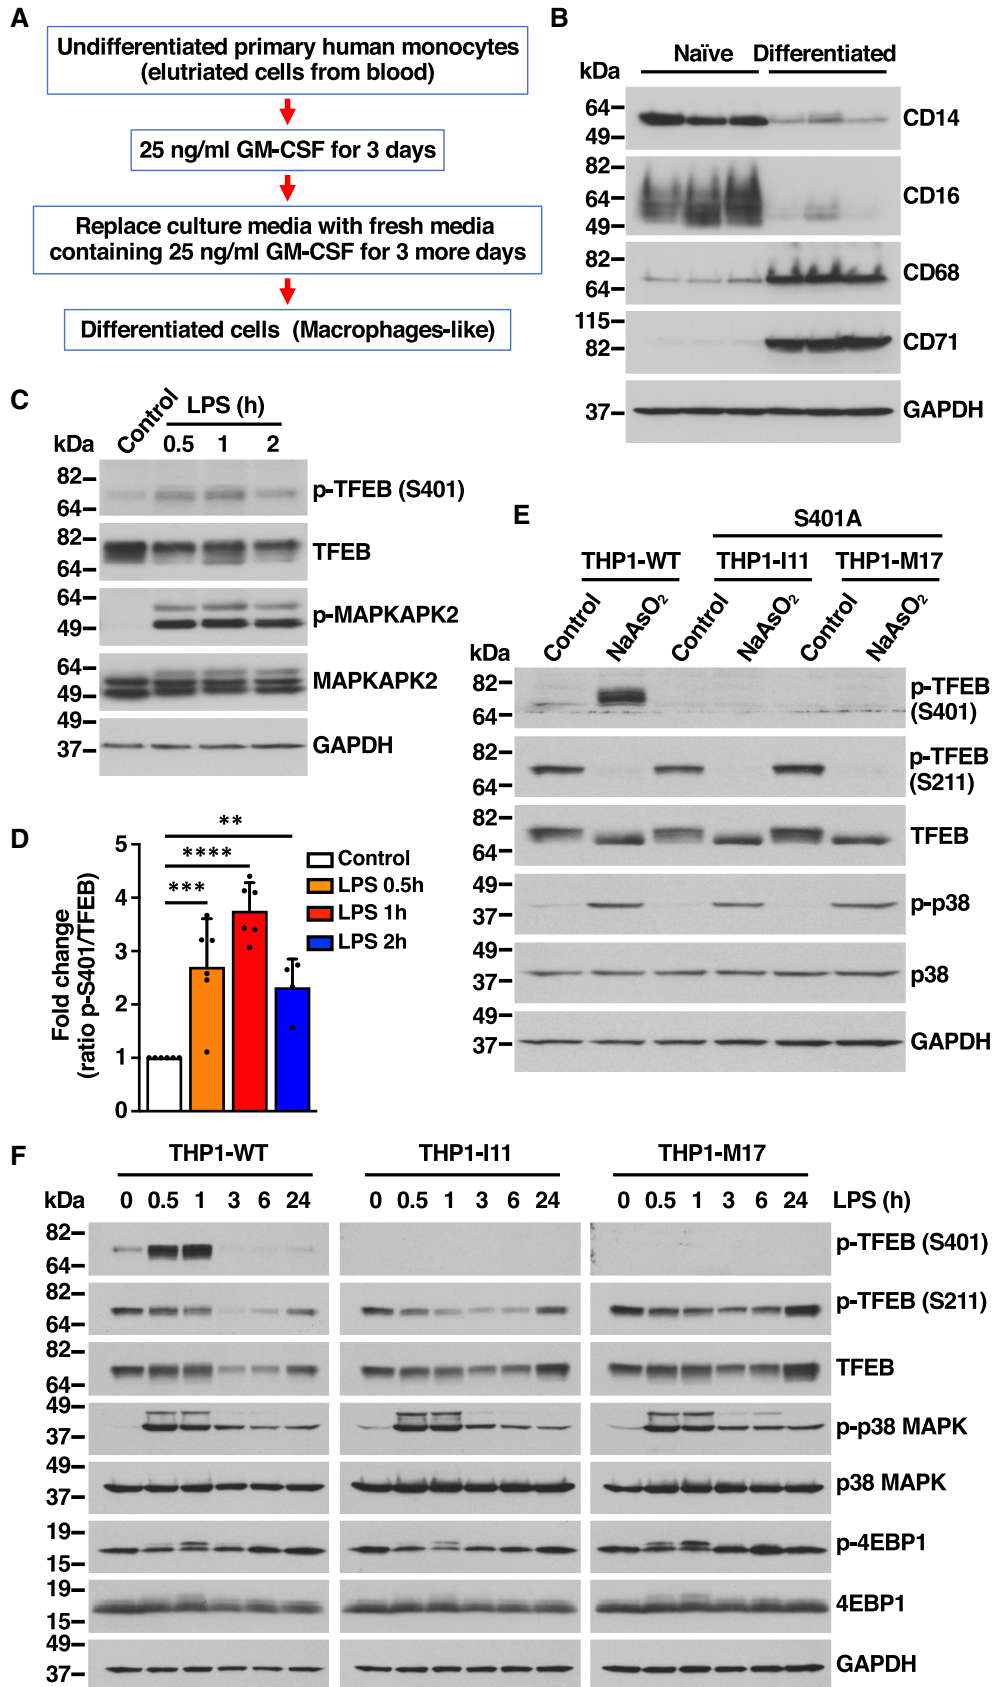

Figure EV3.

**Figure EV4. PMA-dependent activation of TFEB in THP1 cells. Related to Fig 4.**

- A Immunoblot analysis of protein lysates from naïve THP1-WT or TFEB-S401A knock-in (clone I11) cells treated with 50 ng/ml PMA for the indicated times, and PMA-differentiated THP1 (Rested) cells.
- B Immunoblot analysis of protein lysates from naïve THP1-WT cells treated with 50 ng/ml PMA for 30 min and with 100  $\mu$ M NaAsO<sub>2</sub> for 1 h.
- C Quantification of immunoblot data shown in (B). Data are presented as mean  $\pm$  SD using unpaired Student's *t*-test, \*\*\*\**P* < 0.0001 from three independent experiments.
- D Immunoblot analysis of protein lysates from naïve THP1-WT cells treated with 5  $\mu$ M CRT0066101 (CRT, PKD inhibitor) or 5  $\mu$ M Bisindolylmaleimide IV (BIS, PKC inhibitor) for 1 h prior to the addition of 50 ng/ml PMA for 1 h.
- E Immunoblot analysis of proteins from nuclear and cytosolic fractions from naïve THP1-WT treated with 5  $\mu$ M CRT0066101 (CRT, PKD inhibitor) or 5  $\mu$ M Bisindolylmaleimide IV (BIS, PKC inhibitor) for 1 h prior to the addition of 50 ng/ml PMA for 1 h.
- F Quantification of the nuclear localization of recombinant TFEB in HeLa cells expressing TFEB-WT-FLAG treated with 5  $\mu$ M CRT0066101 (CRT, PKD inhibitor) or 5  $\mu$ M Bisindolylmaleimide IV (BIS, PKC inhibitor) for 1 h prior to the addition of 500 ng/ml PMA for 45 min. Data are presented as mean  $\pm$  SD using one-way ANOVA (unpaired) followed by Tukey's multiple comparisons test, \*\*\**P* < 0.001 as compared to PMA-treated cells, with > 200 cells counted per trial from three independent experiments.
- G Immunoblot analysis of proteins from nuclear and cytosolic fractions from naïve THP1-WT or TFEB-S401A knock-in (clone I11) cells nutrients starved with EBSS for 12 h. The antibody directed against the central region of TFEB was obtained from Cell Signaling Technology (CST).
- H Relative quantitative RT-PCR analysis of the mRNA expression of lysosome- (MCOLN1, ATP6V1C1, CTSD, LAMP1, HEXA, RAGC) and autophagy-related (GABARAPL1) genes in naïve THP1-WT or TFEB-S401A knock-in (clone I11) cells nutrients starved with EBSS for 12 h. Data are presented as mean  $\pm$  SD using one-way ANOVA (unpaired) followed by Tukey's multiple comparisons test, \**P* < 0.05 and \*\**P* < 0.01 from three independent experiments.
- I Immunoblot analysis of proteins from nuclear and cytosolic fractions from naïve THP1-WT or TFEB-S401A knock-in (clone I11) cells or PMA-differentiated THP1 (Rested) cells treated with either 50 ng/ml PMA or 250 nM Torin-1 for 1 h.

Data information: *n* = 3 biological replicates (each dot represents a biological replicate).

Source data are available online for this figure.

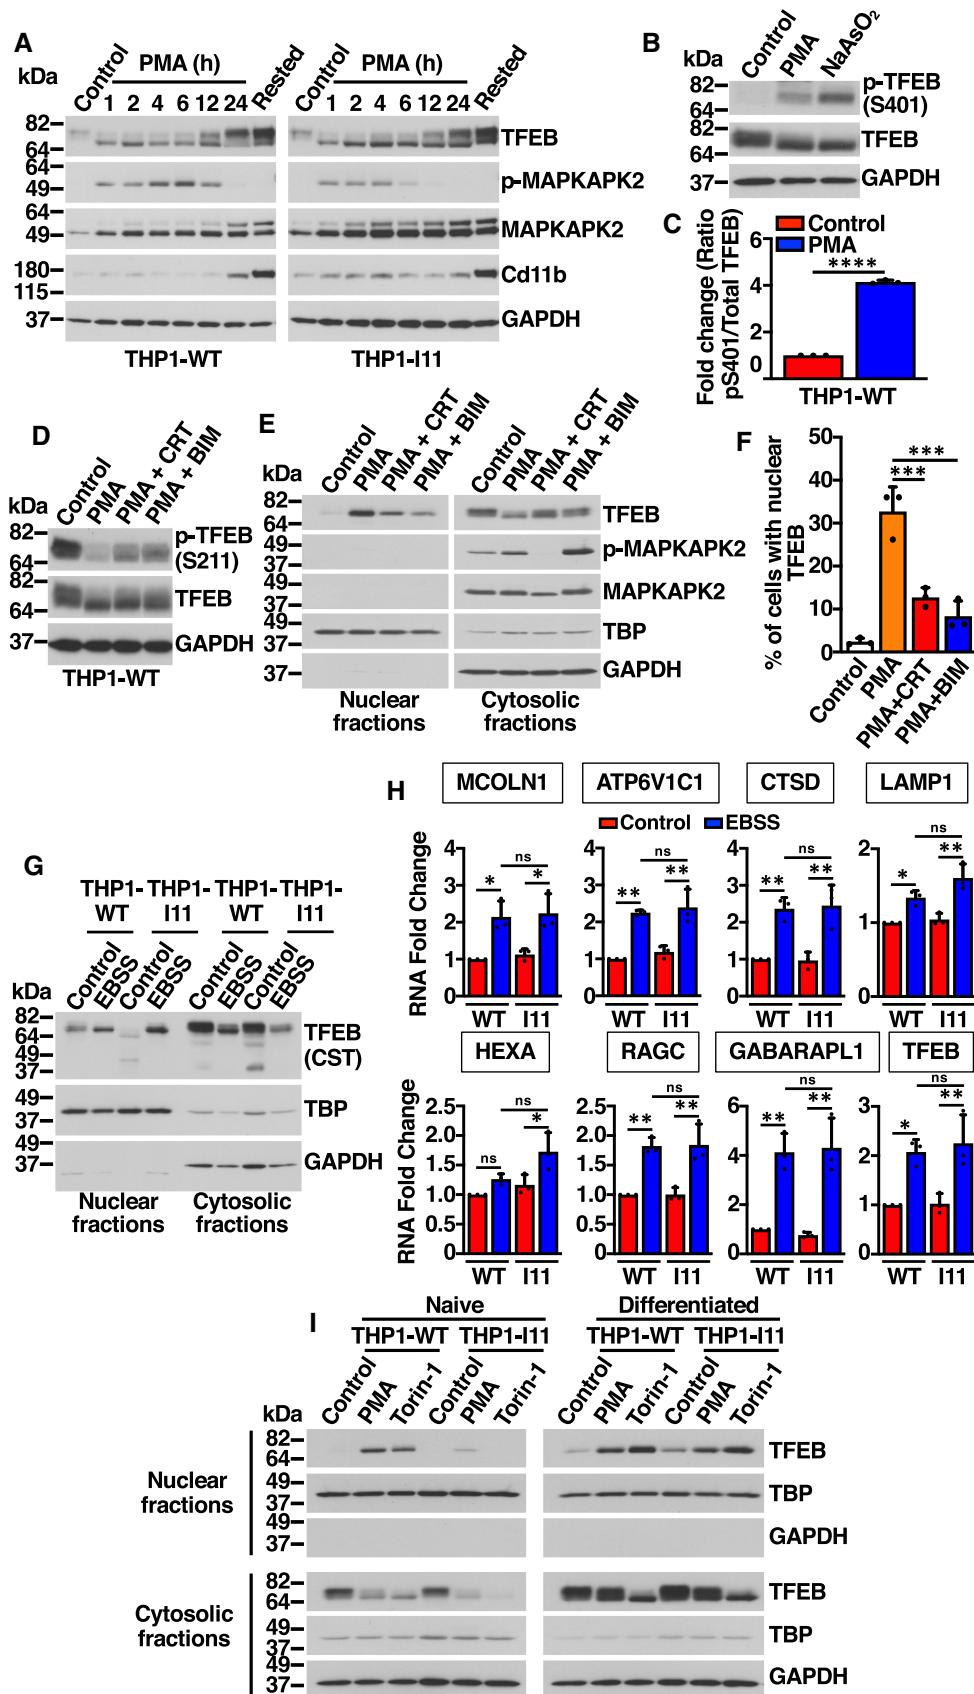

Figure EV4.



**Figure EV5. Macrophage polarization is affected in THP1 TFEB-S401A mutant cells in response to LPS. Related to Fig 6.**

- A Immunoblot analysis of protein lysates from PMA-differentiated (Rested) THP1-WT or TFEB-S401A knock-ins (clones I11 and M17) cells incubated with 1  $\mu\text{g/ml}$  LPS for the indicated times.
- B Quantification of immunoblot data shown in (A). Data are presented as mean  $\pm$  SD using one-way ANOVA (unpaired) followed by Tukey's multiple comparisons test,  $*P < 0.05$  and  $***P < 0.001$  as compared to the same treatment condition in THP1-WT cells from three independent experiments.
- C Immunoblot analysis of proteins from nuclear and cytosolic fractions from PMA-differentiated (Rested) THP1-WT or TFEB-S401A knock-in (clone I11) cells incubated with 1  $\mu\text{g/ml}$  LPS for the indicated times or 250 nM Torin-1 for 1 h.
- D Quantification of immunoblot data shown in (C). Data are presented as mean  $\pm$  SD using one-way ANOVA (unpaired) followed by Tukey's multiple comparisons test, (ns) not significant as compared to the same treatment condition in THP1-WT cells from three independent experiments.
- E Immunofluorescence confocal microscopy of PMA-differentiated (Rested) THP1-WT or TFEB-S401A knock-in (clones I11 and M17) cells incubated with 0.1  $\mu\text{g/ml}$  LPS for 4 h prior to the addition of 15  $\mu\text{M}$  Nigericin for 45 min. Arrows point to the position of ASC specks indicative of inflammasome activation. Scale bars, 10  $\mu\text{m}$ .
- F Quantification of the percentage of cells with ASC specks shown in (E). Data are presented as mean  $\pm$  SD using one-way ANOVA (unpaired) followed by Tukey's multiple comparisons test,  $***P < 0.001$  and  $****P < 0.0001$  as compared to THP1-WT cells treated with LPS + Nigericin with  $> 200$  cells counted per trial from three independent experiments.

Data information:  $n \geq 3$  biological replicates (each dot represents a biological replicate).

Source data are available online for this figure.

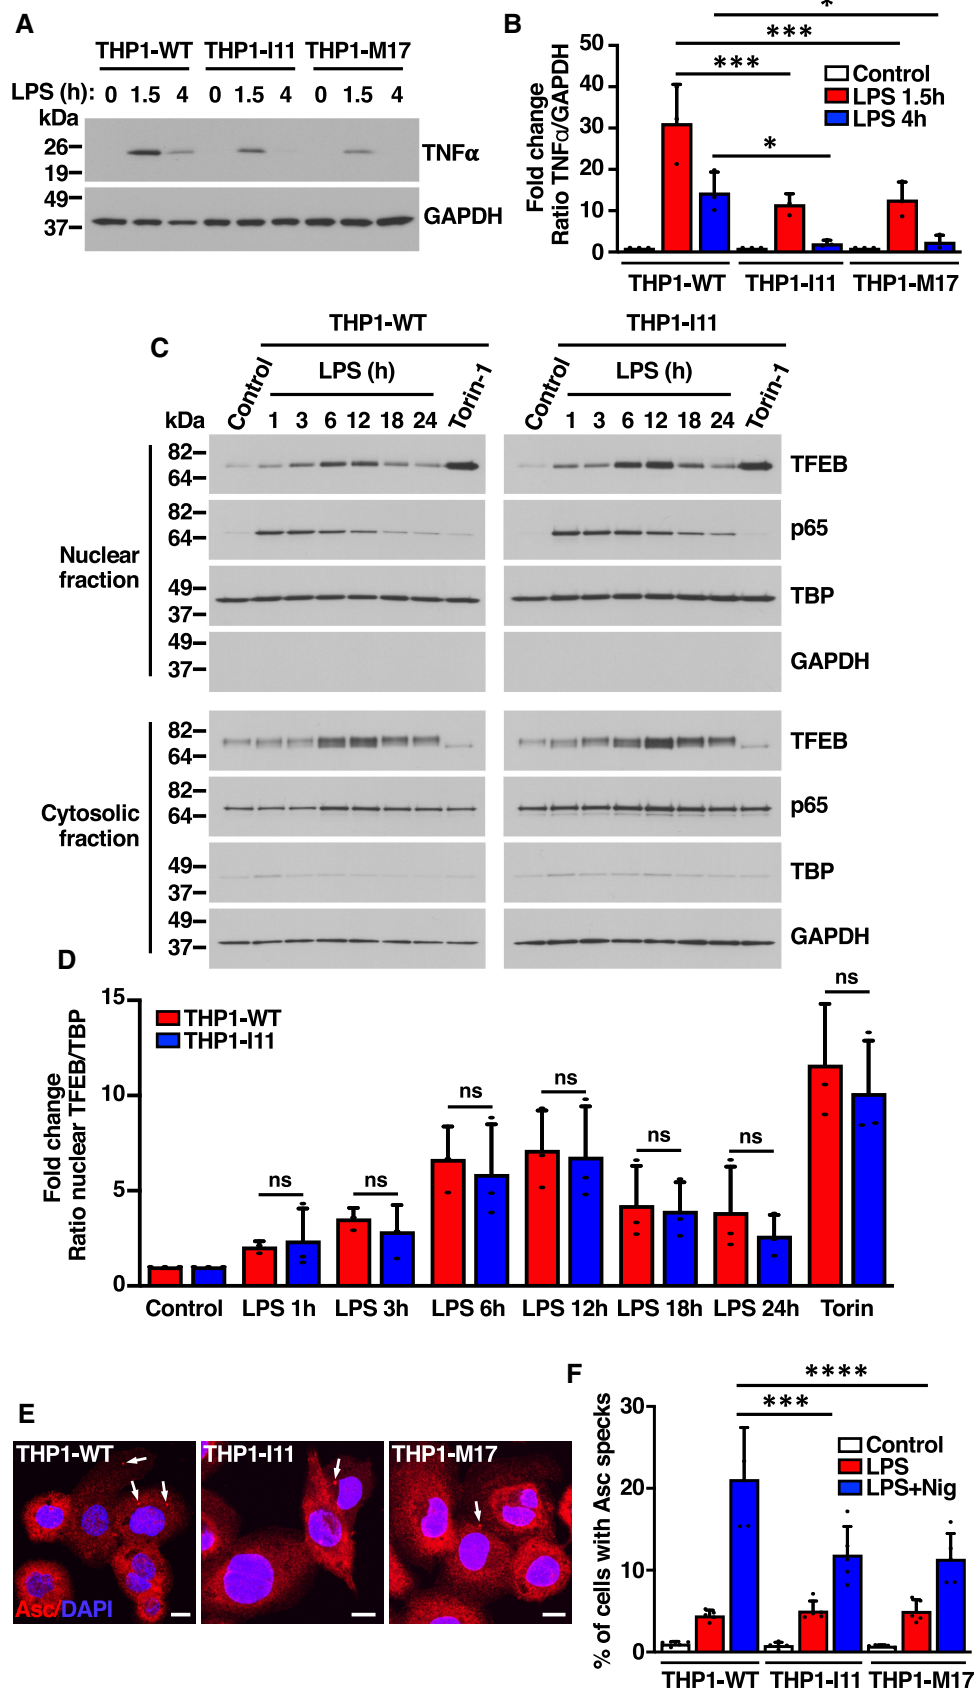

Figure EV5.
