# Supplementary material
Source: PubMed Central journal article supplement (PMC9900348)
Supplement: EMBR-24-e55472-s011.pdf [file EMBR-24-e55472-s011.pdf]

Appendix:

**p38 MAPK-dependent phosphorylation of TFEB promotes monocyte to macrophage differentiation**

José A. Martina, Eutteum Jeong and Rosa Puertollano  
Cell and Developmental Biology Center, National Heart, Lung, and Blood Institute, National Institutes of Health, Bethesda, MD, USA.

Table of contents:

|                         | Page |
|-------------------------|------|
| Appendix Figure S1..... | 1    |
| Appendix Figure S2..... | 3    |
| Appendix Figure S3..... | 4    |
| Appendix Figure S4..... | 5    |
| Appendix Figure S5..... | 6    |
| Appendix Figure S6..... | 8    |
| Appendix Table S1.....  | 9    |
| Appendix Table S2.....  | 10   |
| Appendix Table S3.....  | 11   |

**A**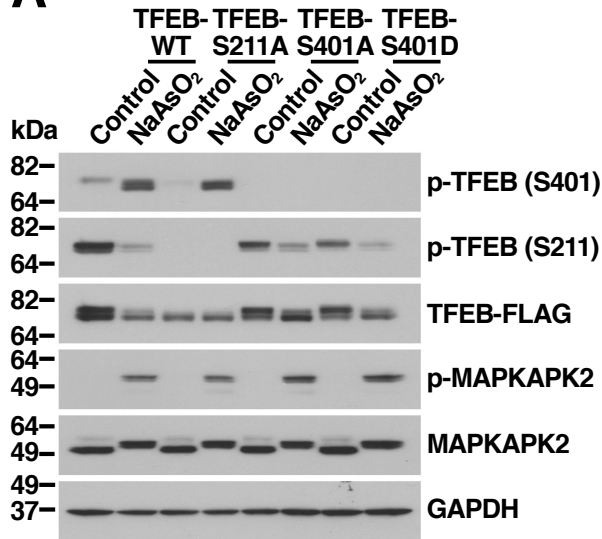**B**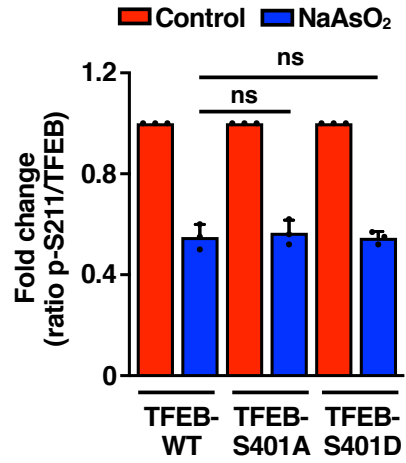**C**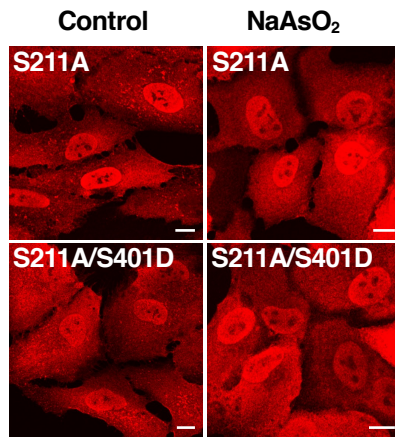**D**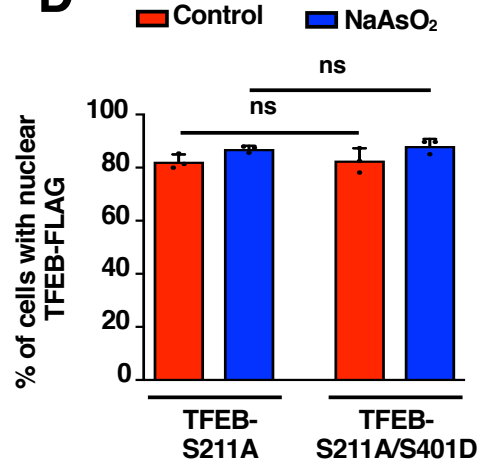**E**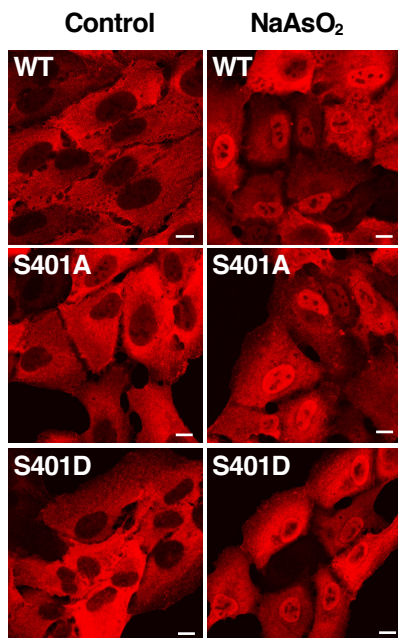**F**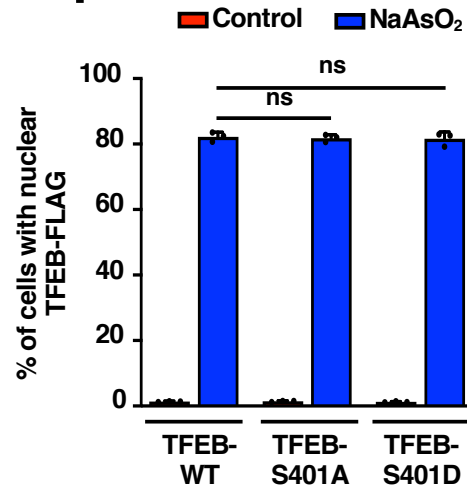

**Appendix Figure S1. Subcellular distribution of TFEB is not affected in S401 mutants upon NaAsO<sub>2</sub> treatment.**

**A.** Immunoblot analysis of protein lysates from ARPE-19 cells expressing TFEB-WT-FLAG, TFEB-S211A-FLAG, TFEB-S401A-FLAG or TFEB-S401D-FLAG treated with 200  $\mu$ M NaAsO<sub>2</sub> for 1 h.

**B.** Quantification of immunoblot data shown in (A). Data are presented as mean  $\pm$  SD using one-way ANOVA, (ns) not significant from three independent experiments.

**C.** Immunofluorescence confocal microscopy of ARPE-19 cells overexpressing TFEB-S211A-FLAG and TFEB-S211A/S401D-FLAG showing the subcellular distribution of recombinant TFEB in response to treatments with 200  $\mu$ M NaAsO<sub>2</sub> for 1 h. Scale bars, 10  $\mu$ m.

**D.** Quantification of the nuclear localization of recombinant TFEB in ARPE-19 cells shown in (C). Data are presented as mean  $\pm$  SD using one-way ANOVA, (ns) not significant as compared to the same treatment in TFEB-S211A-FLAG overexpressing cells, with >150 cells counted per trial from three independent experiments.

**E.** Immunofluorescence confocal microscopy of ARPE-19 cells overexpressing TFEB-WT-FLAG, TFEB-S401A-FLAG or TFEB-S401D-FLAG showing the subcellular distribution of recombinant TFEB in response to treatments with 200  $\mu$ M NaAsO<sub>2</sub> for 1 h. Scale bars, 10  $\mu$ m.

**F.** Quantification of the nuclear localization of recombinant TFEB in ARPE-19 cells shown in (E). Data are presented as mean  $\pm$  SD using one-way ANOVA, (ns) not significant as compared to the same treatment in TFEB-WT-FLAG overexpressing cells, with >200 cells counted per trial from three independent experiments.

Data information: n = 3 biological replicates (each dot represents a biological replicate).

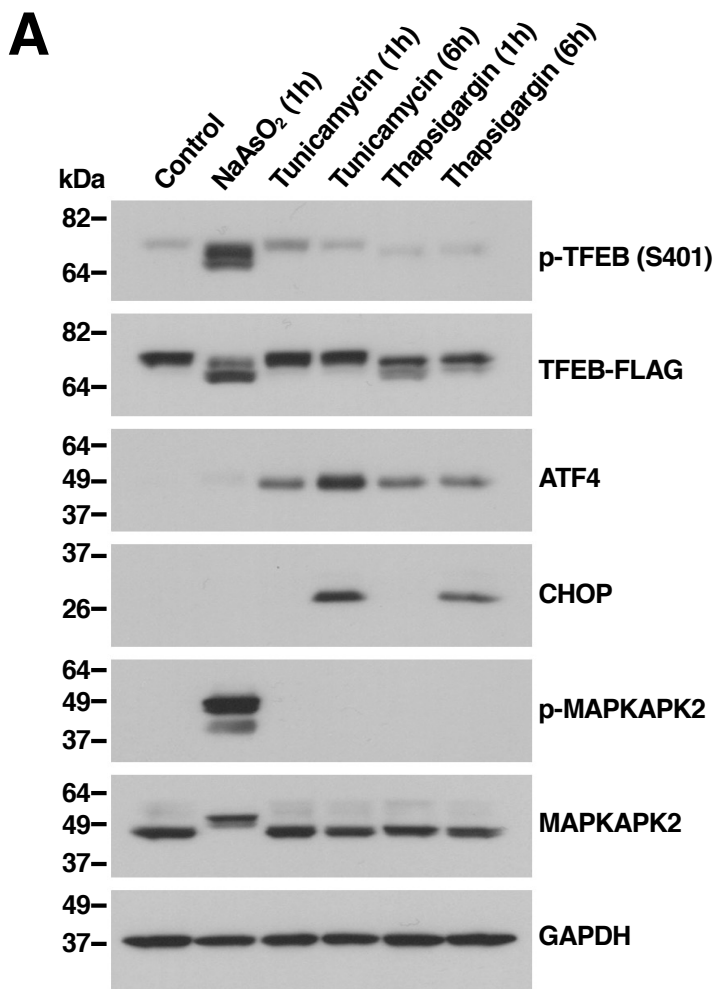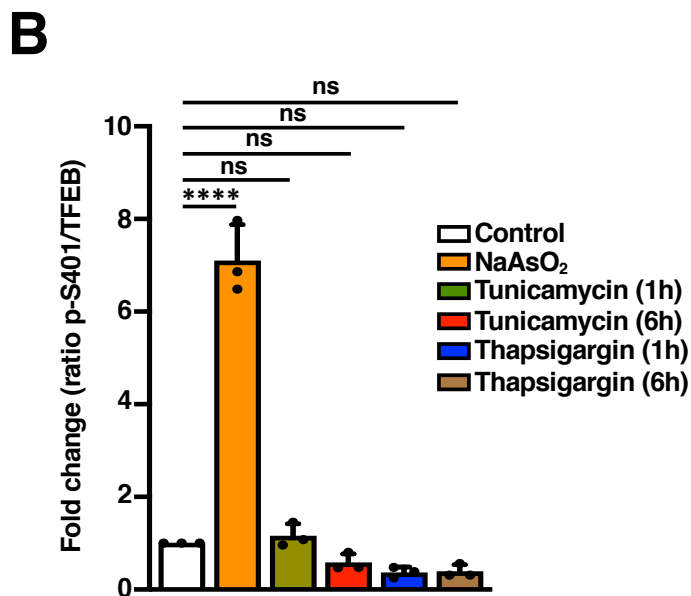

**Appendix Figure S2. ER stress is not responsible for TFEB serine 401 phosphorylation upon NaAsO<sub>2</sub> treatment.**

**A.** Immunoblot analysis of protein lysates from HeLa cells stably expressing TFEB-WT-FLAG incubated with either 200  $\mu$ M NaAsO<sub>2</sub> for 1 h or 5  $\mu$ g/ml Tunicamycin or 100 nM Thapsigargin for 1h and 6h.

**B.** Quantification of immunoblot data shown in (A). Data are presented as mean  $\pm$  SD using one-way ANOVA, (ns) not significant, and (\*\*\*\*) $p < 0.0001$  from three independent experiments (each dot represents a biological replicate).

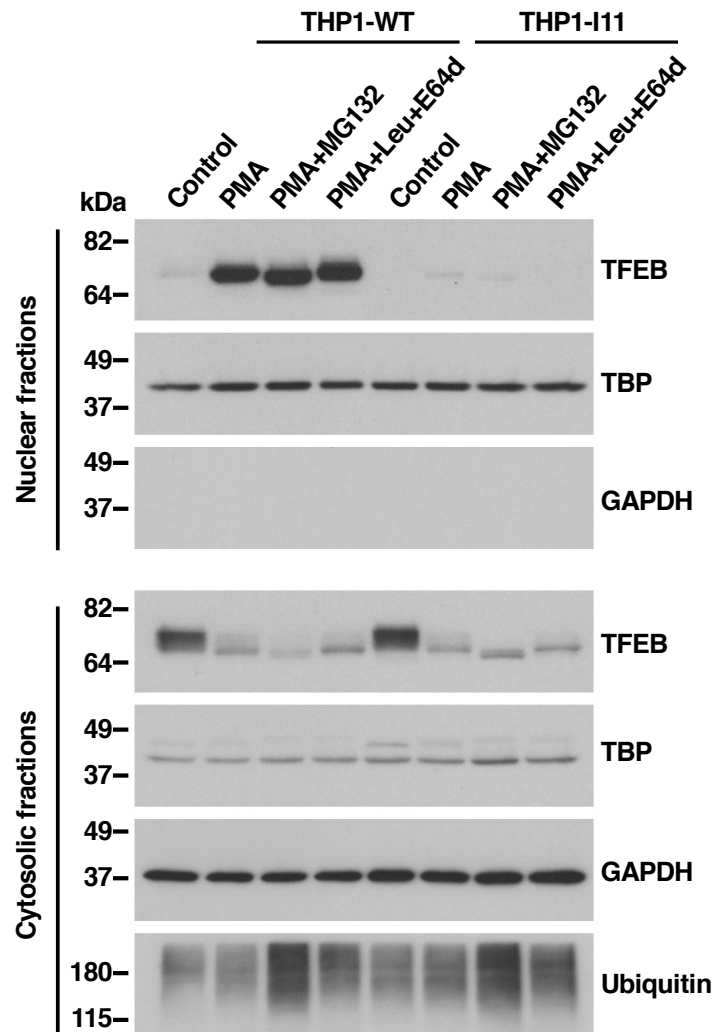

**Appendix Figure S3. Decreased nuclear accumulation of TFEB-S401A is not caused by proteasomal or lysosomal degradation.**

Immunoblot analysis of proteins from nuclear and cytosolic fractions from naïve THP1-WT or TFEB-S401A knock-in (clone I11) cells incubated with either 10  $\mu$ M GM132 or 100  $\mu$ g/ml Leupeptin (Leu) and 10  $\mu$ M E64d for 3 h prior to the addition of 50 ng/ml PMA for 1 h.

**A****Lysosomal genes**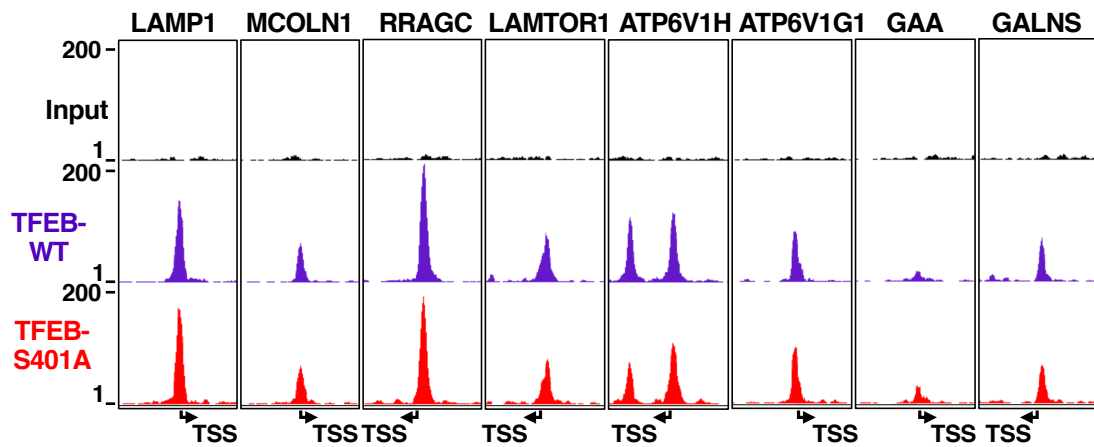**B****Immune genes**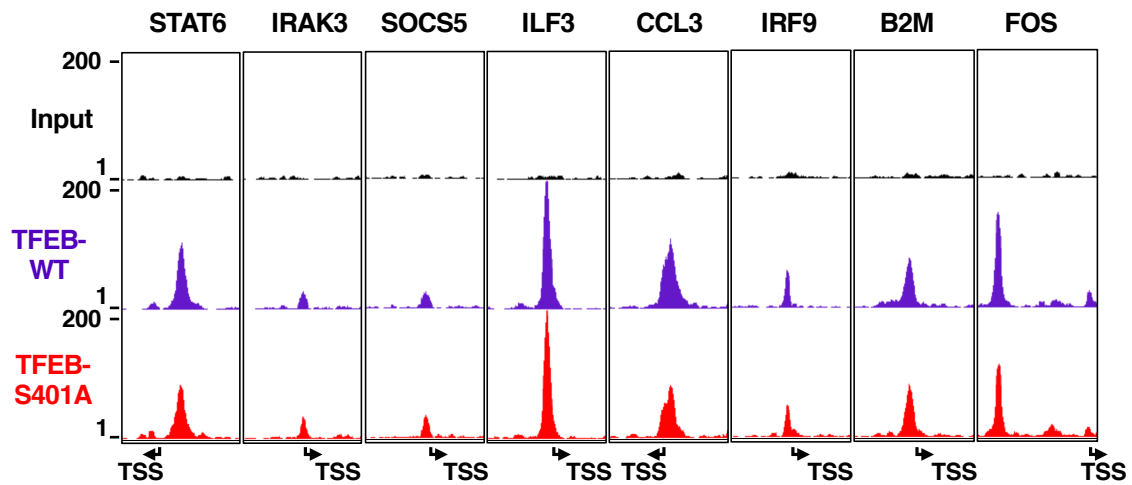

**Appendix Figure S4. TFEB-WT and TFEB-S401A bind to the promoter of lysosomal and immune genes with similar affinity.**

ChIP-seq analysis of lysosomal (A) and immune genes (B) from THP1-WT and TFEB-S401A knock-in (clone I11) cells treated with 50 ng/ml PMA for 12 h. Arrows indicate the transcription start site (TSS) for each gene analyzed.

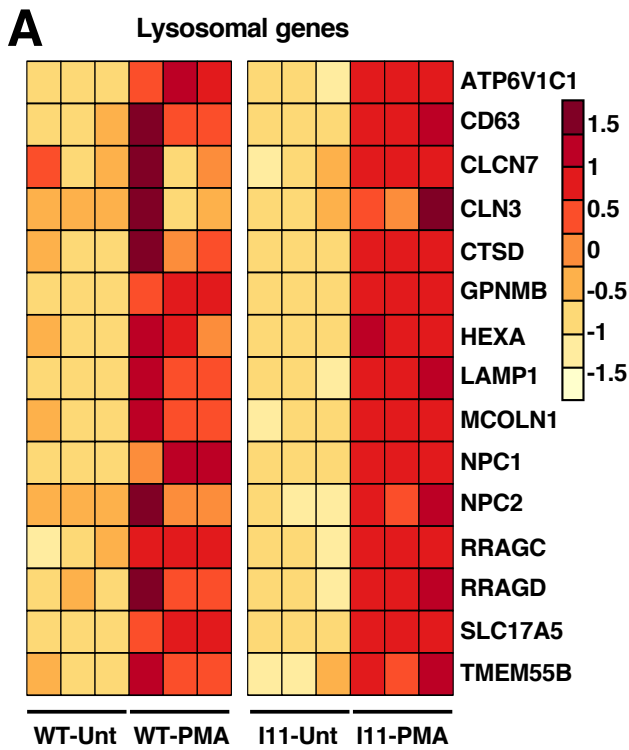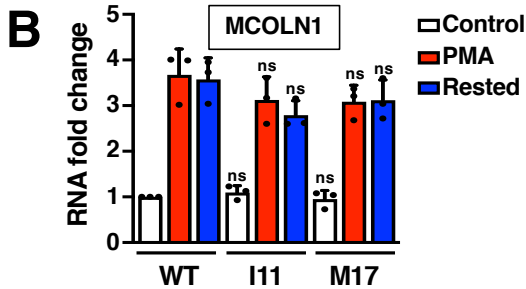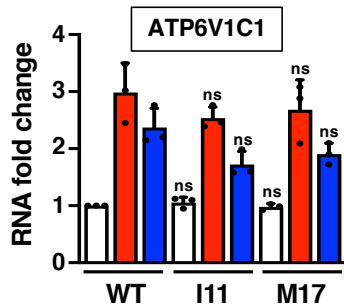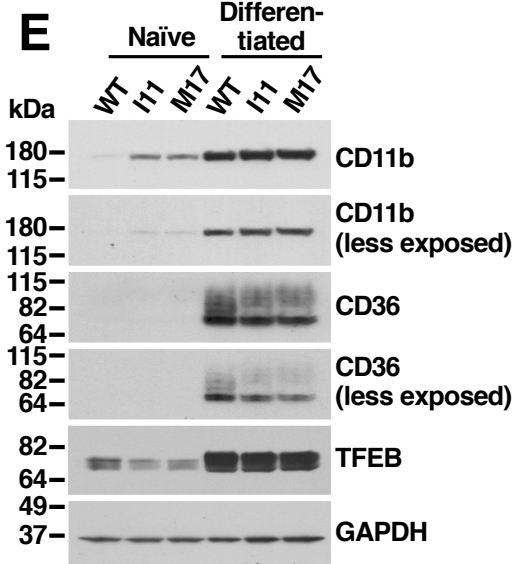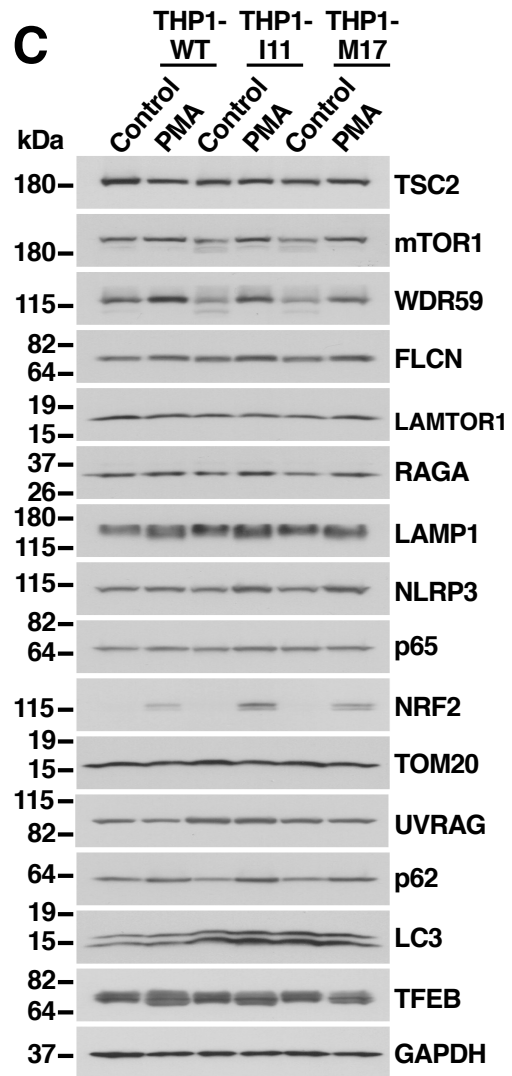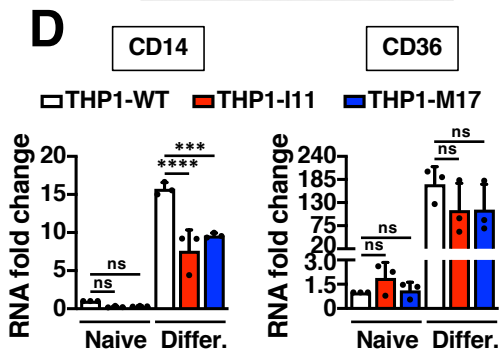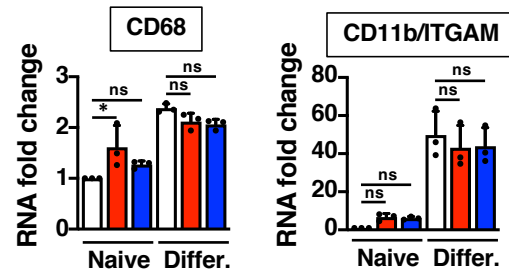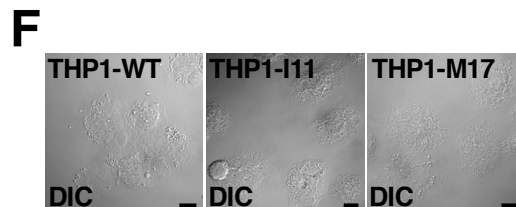

**Appendix Figure S5. PMA-dependent phosphorylation of TFEB-S401 does not result in lysosomal biogenesis in THP1 cells.**

**A.** Heat map of 15 known TFEB lysosomal target genes from RNA-Seq analysis of naïve THP1-WT cells (Control, WT-Unt) or naïve TFEB-S401A knock-in (Control, I11-Unt) cells versus the corresponding cells incubated with 50 ng/ml PMA for 6 h (WT-PMA or I11-PMA).

**B.** Relative quantitative RT-PCR analysis of the mRNA expression of TFEB lysosomal target genes (MCOLN1 and ATP6V1C1) in naïve THP1-WT or TFEB-S401A knock-ins (clones I11 and M17) cells incubated with 50 ng/ml PMA for 24 h as well as PMA-differentiated cells (Rested). Data are presented as mean  $\pm$  SD using one-way ANOVA (unpaired) followed by Tukey's multiple comparisons test, (ns) not significant from three independent experiments.

**C.** Immunoblot analysis of protein lysates from naïve THP1-WT or TFEB-S401A knock-ins (clones I11 and M17) cells treated with 50 ng/ml PMA for 24 h.

**D.** Relative quantitative RT-PCR analysis of the mRNA expression of macrophage surface marker genes in naïve THP1-WT or TFEB-S401A knock-ins (clones I11 and M17) as well as in PMA-differentiated cells (Differ., Rested). Data are presented as mean  $\pm$  SD using one-way ANOVA (unpaired) followed by Tukey's multiple comparisons test, (ns) not significant, (\*) $p < 0.05$ , (\*\*\*) $p < 0.001$  and (\*\*\*\*) $p < 0.0001$  from three independent experiments.

**E.** Immunoblot analysis of protein lysates from naïve THP1-WT or TFEB-S401A knock-ins (clones I11 and M17) cells as well as PMA-differentiated cells. Immunoblots are representative of at least three independent experiments.

**F.** Differential interference contrast microscopy (DIC) of PMA-differentiated (Rested) THP1-WT or TFEB-S401A knock-ins (clones I11 and M17) cells. Scale bars, 10  $\mu$ m.

Data information:  $n = 3$  biological replicates (each dot represents a biological replicate).



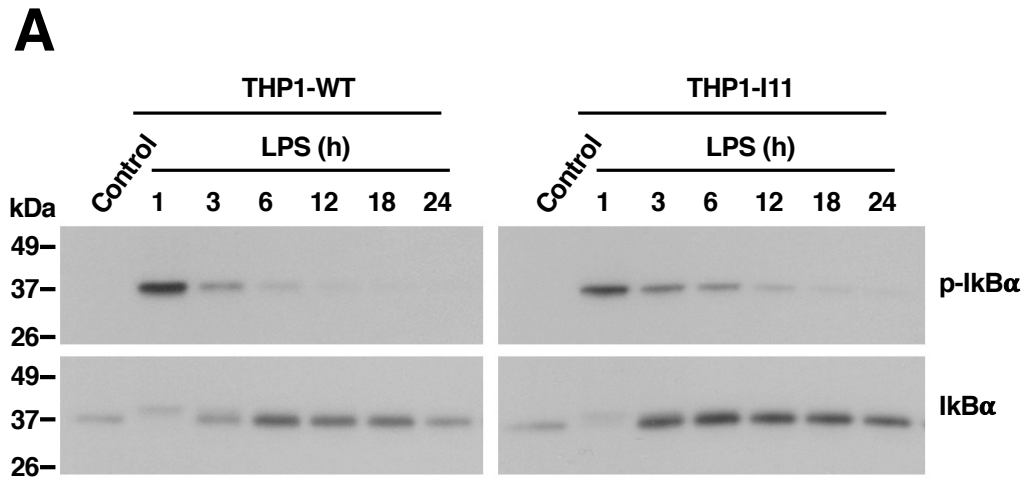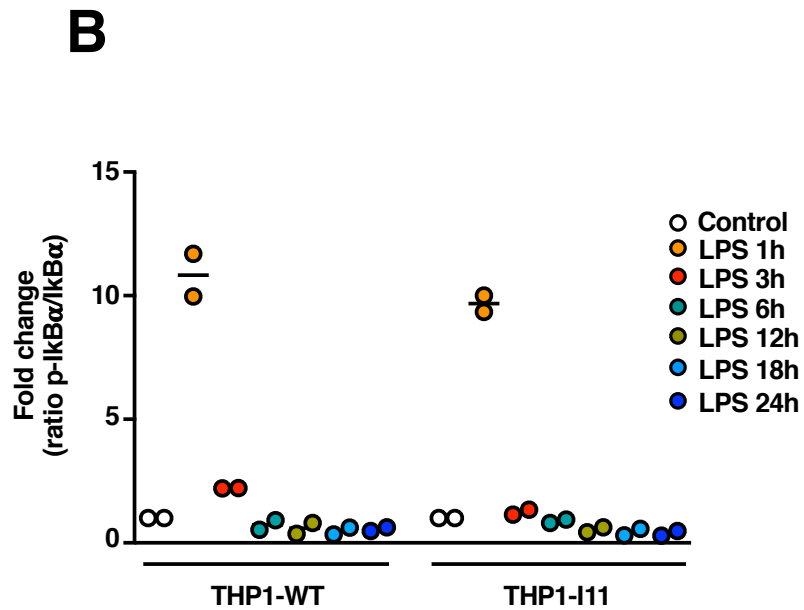

**Appendix Figure S6. Normal activation of NF- $\kappa$ B pathway in THP1 S401A mutant cells.**

**A.** Immunoblot analysis of protein lysates from PMA-differentiated THP1-WT or TFEB-S401A knock-in (clone I11) cells incubated with 1  $\mu$ g/ml LPS for the indicated times.

**B.** Quantification of immunoblot data shown in (A). Data are presented as mean, and dots represent individual biological replicates.

**Appendix Table S1: Top 10 most significant differentially expressed gene sets between PMA-treated THP1-WT and PMA-treated THP1-I11 cells (MSigDB Hallmark 2020)**

| Term                              | p-value | q-value | Overlap genes                                                                                                                                                                                                                                                                  |
|-----------------------------------|---------|---------|--------------------------------------------------------------------------------------------------------------------------------------------------------------------------------------------------------------------------------------------------------------------------------|
| TNF-alpha Signaling via NF-kB     | 2.0E-26 | 9.6E-25 | [CDKN1A, BTG1, SDC4, TNFAIP6, RNF19B, CXCL1, SLC2A3, CXCL3, AREG, TNF, CXCL2, ICAM1, DRAM1, NFIL3, CCND1, CCL5, CCRL2, PHLDA1, IER2, IER3, TGIF1, EGR1, DUSP2, JAG1, DUSP1, IFNGR2, PLAUR, FOS, TRAF1, ATP2B1, NFKBIA, YRDC, SPSB1, BCL6, IL1B, BCL3, PTX3, FJX1, CD44, HBEGF] |
| Inflammatory Response             | 2.3E-17 | 5.5E-16 | [CDKN1A, CALCRL, CXCL8, TNFAIP6, PTGER2, AQP9, AHR, ICAM1, RGS1, CCL5, PDPN, CCRL2, CLEC5A, CD55, MSR1, IFNGR2, PLAUR, ATP2B1, ACVR2A, EREG, NFKBIA, MMP14, P2RX4, ADORA2B, IL1B, LTA, CD48, ITGA5, MET, CHST2, HBEGF]                                                         |
| IL-2/STAT5 Signaling              | 8.0E-14 | 1.3E-12 | [ECM1, PTGER2, GPR65, SLC2A3, FURIN, AHR, ALCAM, PNP, SOCS1, NFIL3, SPP1, PHLDA1, EOMES, PRNP, SPRY4, EMP1, TRAF1, DHRS3, HOPX, CKAP4, ARL4A, CDCP1, P2RX4, TLR7, CD48, CD44, TNFRSF21]                                                                                        |
| Epithelial Mesenchymal Transition | 5.7E-09 | 6.9E-08 | [OXTR, ECM1, CXCL8, SERPINE2, SDC4, LAMA2, PRRX1, IGFBP3, TFP12, PLAUR, CXCL1, AREG, FGF2, MMP14, COL4A2, DPYSL3, SPP1, PTX3, ITGA5, FERMT2, CD44]                                                                                                                             |
| p53 Pathway                       | 7.2E-07 | 6.9E-06 | [CDKN1A, BTG1, PDGFA, RNF19B, FOS, TM4SF1, ZFP36L1, RAP2B, SOCS1, DRAM1, DDIT3, PLXNB2, STOM, TRIB3, UPP1, IER3, S100A10, HBEGF]                                                                                                                                               |
| Hypoxia                           | 3.2E-06 | 2.6E-05 | [CDKN1A, BTG1, SDC4, ANXA2, DUSP1, TGFB3, IGFBP3, PLAUR, SLC2A3, ENO1, FOS, EXT1, NFIL3, ADORA2B, DDIT3, CHST2, IER3]                                                                                                                                                          |
| Allograft Rejection               | 5.3E-05 | 3.6E-04 | [IFNGR2, GPR65, GCNT1, TNF, ACVR2A, ICAM1, EREG, SOCS1, IL1B, CCL5, BCL3, EIF3J, ST8SIA4, APBB1, CCR5]                                                                                                                                                                         |
| Apoptosis                         | 7.8E-05 | 4.7E-04 | [CDKN1A, ANXA1, EMP1, TNF, EREG, KRT18, CCND1, ANKH, DDIT3, IL1B, LMNA, CD44, IER3]                                                                                                                                                                                            |
| IL-6/JAK/STAT3 Signaling          | 1.5E-04 | 8.2E-04 | [SOCS1, IFNGR2, IL1B, CXCL1, CXCL3, A2M, TNF, TNFRSF21, CD44]                                                                                                                                                                                                                  |
| KRAS Signaling Up                 | 1.9E-04 | 9.2E-04 | [PRRX1, IGFBP3, PLAUR, EMP1, TRAF1, GNG11, EREG, HSD11B1, YRDC, ANKH, IL1B, SPP1, PLEK2, HBEGF]                                                                                                                                                                                |

Appendix Table S2: primary and secondary antibodies

| Target                                | Company; Catalogue Number        | Dilution                  |
|---------------------------------------|----------------------------------|---------------------------|
| 4E-BP1                                | Cell Signaling Technology; 9644  | 1:5000 (WB)               |
| ATF4                                  | Cell Signaling Technology; 11815 | 1:1000 (WB)               |
| ASC                                   | AdipoGen; AG-25B-0006            | 1:2000 (IF)               |
| c-JUN                                 | Cell Signaling Technology; 9165  | 1:1000 (WB)               |
| CD11b/ITGAM                           | Cell Signaling Technology; 49420 | 1:1000 (WB)               |
| CD14                                  | Cell Signaling Technology; 56082 | 1:1000 (WB)               |
| CD16                                  | Cell Signaling Technology; 80006 | 1:1000 (WB)               |
| CD36                                  | Cell Signaling Technology; 14347 | 1:1000 (WB)               |
| CD68                                  | Cell Signaling Technology; 86985 | 1:1000 (WB)               |
| CD71                                  | Cell Signaling Technology; 13113 | 1:1000 (WB)               |
| CHOP                                  | Cell Signaling Technology; 2895  | 1:1000 (WB)               |
| CLEAVED GASDERMIN D                   | Cell Signaling Technology; 36425 | 1:500 (WB)                |
| eIF4E                                 | Cell Signaling Technology; 2067  | 1:1000 (WB)               |
| FLAG                                  | Sigma-Aldrich; F1804             | 1:50000 (WB), 1:6000 (IF) |
| FLCN                                  | Cell Signaling Technology; 3697  | 1:1000 (WB)               |
| GAPDH                                 | Thermo-Fisher; AM4300            | 1:50000 (WB)              |
| GASDERMIN D                           | Cell Signaling Technology; 39754 | 1:500 (WB)                |
| I $\kappa$ B $\alpha$                 | Cell Signaling Technology; 4814  | 1:1000 (WB)               |
| IL18                                  | Cell Signaling Technology; 54943 | 1:500 (WB)                |
| IL1 $\beta$                           | GeneTex; GTX130021               | 1:2000 (WB)               |
| JNK1                                  | Cell Signaling Technology; 3708  | 1:1000 (WB)               |
| JNK2                                  | Cell Signaling Technology; 9258  | 1:1000 (WB)               |
| LAMP-1                                | DSHB, University of Iowa; H4A3   | 1:3000 (WB)               |
| LAMTOR1                               | Sigma-Aldrich; HPA002997         | 1:1000 (WB)               |
| LC3                                   | Sigma-Aldrich; L7543             | 1:2000 (WB)               |
| MAPKAPK-2                             | Cell Signaling Technology; 12155 | 1:5000 (WB)               |
| MAPKAPK-3                             | Cell Signaling Technology; 7421  | 1:500 (WB)                |
| MSK1                                  | Bethyl Laboratories; A302-747A   | 1:1000 (WB)               |
| MSK2                                  | Bethyl Laboratories; A302-746A   | 1:500 (WB)                |
| mTOR                                  | Cell Signaling Technology; 2983  | 1:1000 (WB)               |
| NF- $\kappa$ B p65                    | Cell Signaling Technology; 8242  | 1:5000 (WB)               |
| NLRP3                                 | Cell Signaling Technology; 15101 | 1:1000 (WB)               |
| NRF2                                  | Cell Signaling Technology; 12721 | 1:250 (WB)                |
| p38 MAPK                              | Cell Signaling Technology; 9212  | 1:2000 (WB)               |
| p38 $\alpha$ MAPK                     | Cell Signaling Technology; 9218  | 1:1000 (WB)               |
| p38 $\beta$ MAPK                      | Cell Signaling Technology; 2339  | 1:1000 (WB)               |
| p38 $\gamma$ MAPK                     | Cell Signaling Technology; 2307  | 1:1000 (WB)               |
| p38 $\delta$ MAPK                     | Cell Signaling Technology; 2308  | 1:1000 (WB)               |
| p44/42 MAPK (Erk1/2)                  | Cell Signaling Technology; 9102  | 1:2000 (WB)               |
| Phospho-4E-BP1 (Ser65)                | Cell Signaling Technology; 9451  | 1:500 (WB)                |
| Phospho-c-JUN (Ser73)                 | Cell Signaling Technology; 3270  | 1:1000 (WB)               |
| Phospho-eIF4E (Ser209)                | Cell Signaling Technology; 9741  | 1:500 (WB)                |
| Phospho-I $\kappa$ B $\alpha$ (Ser32) | Cell Signaling Technology; 2859  | 1:500 (WB)                |
| Phospho-MAPKAPK-2 (Thr334)            | Cell Signaling Technology; 3007  | 1:1000 (WB)               |
| Phospho-p38 MAPK (Thr180/Tyr182)      | Cell Signaling Technology; 9211  | 1:2000 (WB)               |
| Phospho-p44/42 MAPK (Thr202/Tyr204)   | Cell Signaling Technology; 4377  | 1:2000 (WB)               |
| Phospho-TFEB (Ser211)                 | Cell Signaling Technology; 37681 | 1:500 (WB)                |
| RagA                                  | Cell Signaling Technology; 4357  | 1:1000 (WB)               |
| SQSTM1/p62                            | Abcam; ab155686                  | 1:3000 (WB)               |
| TBP                                   | Cell Signaling Technology; 44059 | 1:5000 (WB)               |
| TFE3                                  | Sigma-Aldrich; HPA023881         | 1:2000 (WB)               |
| TFEB                                  | Cell Signaling Technology; 4240  | 1:3000 (WB)               |
| TFEB                                  | Cell Signaling Technology; 37785 | 2-4 $\mu$ g (ChIP)        |
| TFEB                                  | Bethyl Laboratories; A303-673A   | 1:3000 (WB), 1:3000 (IF)  |
| TNF- $\alpha$                         | Cell Signaling Technology; 8184  | 1:500 (WB)                |
| TOM20                                 | Cell Signaling Technology; 42406 | 1:2000 (WB)               |
| TUBERIN/TSC2                          | Cell Signaling Technology; 4308  | 1:2000 (WB)               |
| UVRAG                                 | Cell Signaling Technology; 5320  | 1:1000 (WB)               |
| WDR59                                 | Cell Signaling Technology; 53385 | 1:2000 (WB)               |
| Goat anti-rabbit IgG-Alexa Fluor 568  | Thermo-Fisher; A-11036           | 1:1000 (IF)               |
| Goat anti-mouse IgG-Alexa Fluor 568   | Thermo-Fisher; A-11008           | 1:1000 (IF)               |
| Horse anti-mouse IgG-HRP              | Cell Signaling Technology; 7076  | 1:8000 (WB)               |
| Goat anti-rabbit IgG-HRP              | Cell Signaling Technology; 7074  | 1:8000 (WB)               |

WB: western blot, IF: immunofluorescence, ChIP: Chromatin immunoprecipitation

**Appendix Table S3: qRT-PCR primers**

| <b>Gene Symbol</b> | <b>Company; Catalogue Number</b> |
|--------------------|----------------------------------|
| ATP6V1C1           | QIAGEN; QT00015022               |
| CCL5               | QIAGEN; QT00090083               |
| CD11b/ITGAM        | QIAGEN; QT00031500               |
| CD14               | QIAGEN; QT00208817               |
| CD36               | QIAGEN; QT01674008               |
| CD68               | QIAGEN; QT00037184               |
| CTSD               | QIAGEN; QT00020391               |
| CXCL1              | QIAGEN; QT00199752               |
| CXCL3              | QIAGEN; QT00015442               |
| CXCL5              | QIAGEN; QT00203686               |
| CXCL6              | QIAGEN; QT00211155               |
| CXCL8              | QIAGEN; QT00000322               |
| EREG               | QIAGEN; QT00019194               |
| GABARAPL1          | QIAGEN; QT00096509               |
| GAPDH              | QIAGEN; QT01192646               |
| HEXA               | QIAGEN; QT00079877               |
| IFNGR2             | QIAGEN; QT00089278               |
| IL10               | QIAGEN; QT00041685               |
| IL18               | QIAGEN; QT00014560               |
| IL1R               | QIAGEN; QT00081263               |
| IL1 $\beta$        | QIAGEN; QT00021385               |
| IL23A              | QIAGEN; QT00204078               |
| IL33               | QIAGEN; QT00041559               |
| LAMP1              | QIAGEN; QT00070994               |
| LIF                | QIAGEN; QT00001442               |
| MCOLN1             | QIAGEN; QT00094234               |
| RRAGC              | QIAGEN; QT00086527               |
| TFEB               | QIAGEN; QT00069951               |
| TNF $\alpha$       | QIAGEN; QT00029162               |
